# Supplementary material for: Indium(iii)-2,5-pyridine dicarboxylate complexes with mononuclear, 1D chain, 2D layer and 3D chiral frameworks
Source: Royal Society of Chemistry journal article supplement (doi:10.1039/b817972g), 2009-01-01
Supplement: b817972g.pdf [file b817972g.pdf]

## Supplementary Information

# Indium(III)-2,5-Pyridine Dicarboxylate Complexes with Mononuclear, 1D Chain, 2D Layer and 3D Chiral Frameworks

Qiang Gao,<sup>ab</sup> Fei-Long Jiang,<sup>a</sup> Ming-Yan Wu,<sup>a</sup> You-Gui Huang,<sup>a</sup> Da-Qiang Yuan,<sup>a</sup>  
Wei Wei<sup>ab</sup>, Mao-Chun Hong<sup>\*a</sup>

<sup>a</sup>*Key Laboratory of Optoelectronic Materials Chemistry and Physics, Fujian Institute of Research  
on the Structure of Matter, Chinese Academy of Sciences, Fuzhou 350002, China*

Tel: +86-591-83792460 Fax: +86-591-83794946

E-mail: [hmc@fjirsm.ac.cn](mailto:hmc@fjirsm.ac.cn)

<sup>b</sup>*Graduate school of Chinese Academy of Science, Beijing, China*

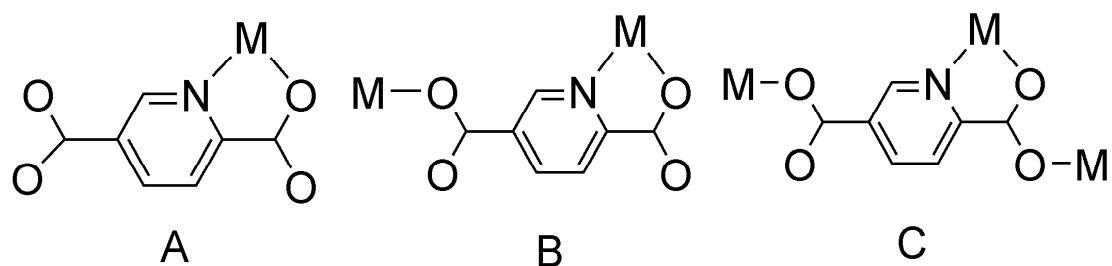

Scheme.S1. Schematic representation of the observed coordination modes of 2,5-pdc for compounds **1-5**.

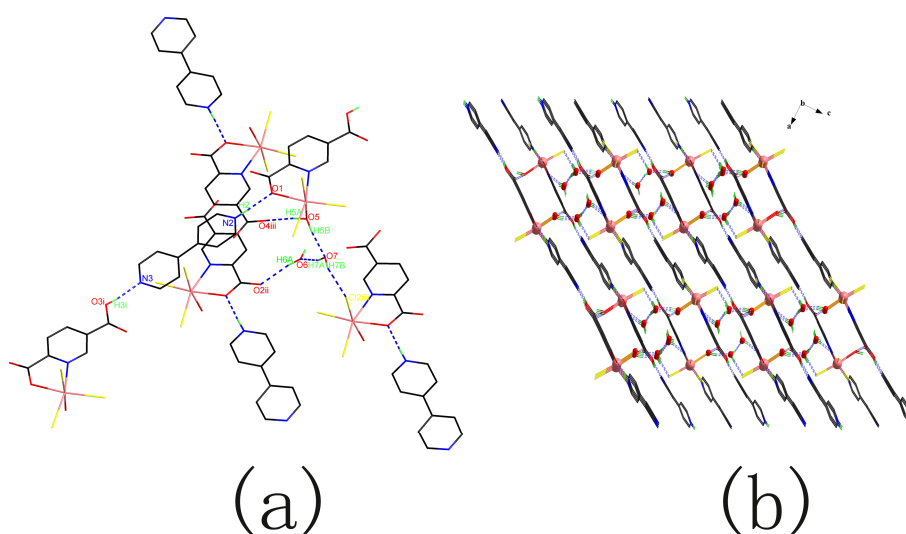

Fig. S1. Details of hydrogen bonds formed in **1** (a). Stick representation of the 3D network of **1** (b). Hydrogen bonds are shown in dashed blue lines. Symmetry code: i:  $x-1, y+1, z-1$ ; ii:  $x, -y+5/2, z-1/2$ ; iii:  $-x+1, y+1/2, -z+1/2$ ; iiiii:  $x, -y+3/2, z-1/2$ .

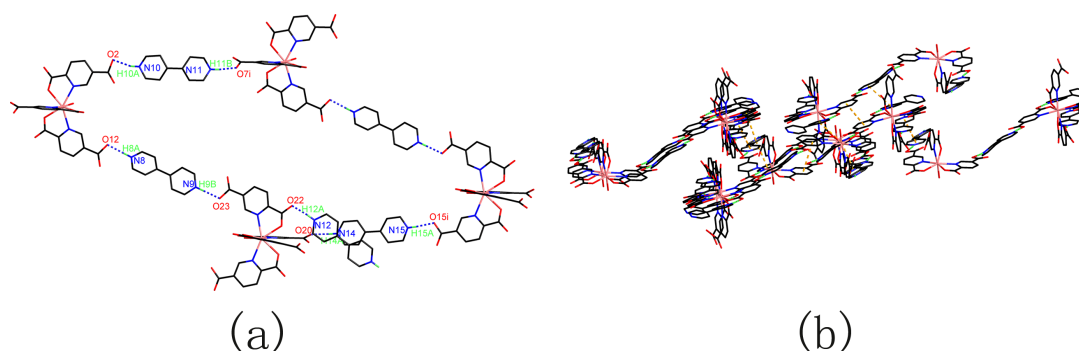

Fig. S2. Details of hydrogen bonds formed between 4,4'-H<sub>2</sub>bipy and In(III) coordination spheres (a). Schematic representation of the  $\pi$ - $\pi$  interaction **2** along [110] direction, indicated by dashed yellow lines (b). Hydrogen bonds are shown in dashed blue lines. Symmetry code: i:  $x+1, y+1, z$ .

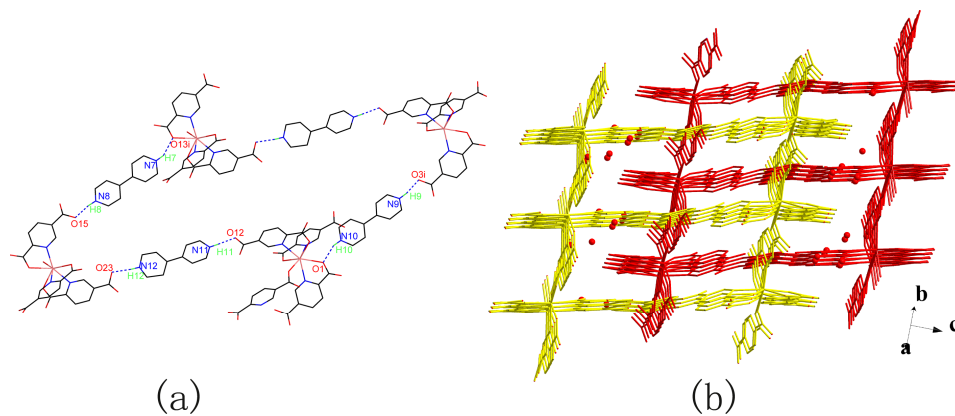

Fig. S3. Details of hydrogen bonds formed between 4,4'- H<sub>2</sub>bipy and In(III) coordination spheres. Hydrogen bonds are shown in dashed blue lines (a) Interpenetration of two bilayers in **3** (b).

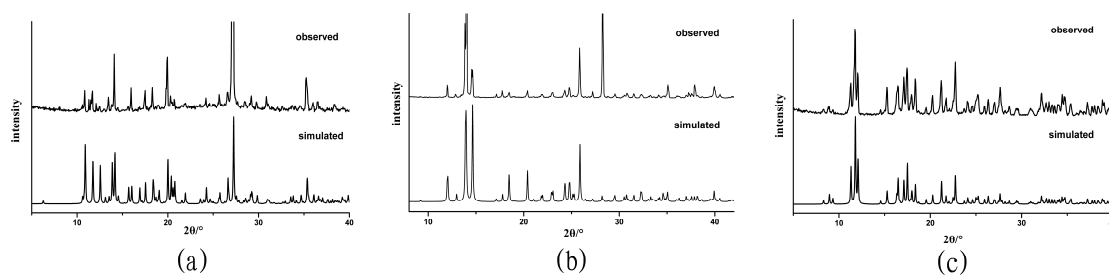

Fig. S4. X-ray powder diffraction (XPD) patterns of compounds **1** (a), **4** (b) and **5** (a).

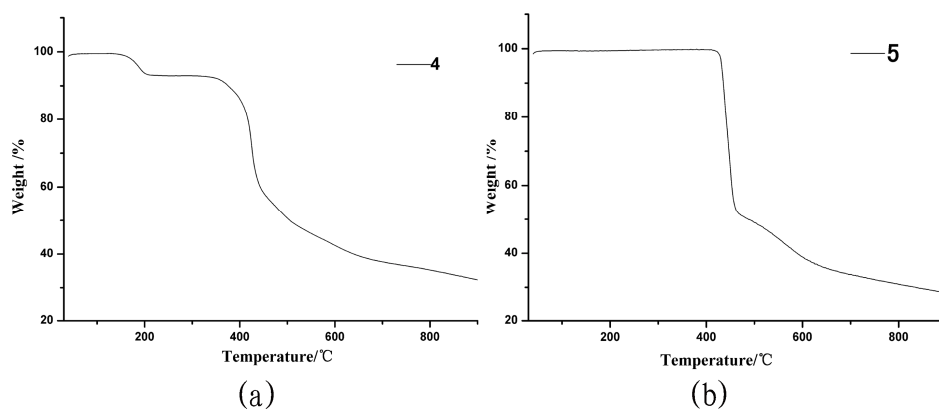

Fig. S5. The TG curves of compounds **4** (a) and **5** (b).

Table S1 Hydrogen bonds for 1- 4 [ $\text{\AA}$  and  $^\circ$ ].

| D-H...A                          | d(D-H) | d(H...A) | d(D...A)   | $\angle(\text{DHA})$ |
|----------------------------------|--------|----------|------------|----------------------|
| <b>1</b>                         |        |          |            |                      |
| O(5)-H(5B)...O(7) <sup>i</sup>   | 0.88   | 1.76     | 2.624(3)   | 165.2                |
| N(2)-H(2)...O(1) <sup>i</sup>    | 0.90   | 1.81     | 2.710(2)   | 177.3                |
| O(6)-H(6B)...O(2) <sup>i</sup>   | 0.85   | 2.05     | 2.872(3)   | 164.3                |
| O(3)-H(3A)...N(3) <sup>ii</sup>  | 0.81   | 1.76     | 2.566(3)   | 172.6                |
| O(5)-H(5A)...O(4) <sup>iii</sup> | 0.89   | 2.00     | 2.885(3)   | 171.0                |
| O(7)-H(7A)...O(6) <sup>iv</sup>  | 0.84   | 1.94     | 2.759(4)   | 165.0                |
| O(7)-H(7B)...Cl(2) <sup>v</sup>  | 0.86   | 2.44     | 3.280(2)   | 165.3                |
| <b>2</b>                         |        |          |            |                      |
| N8—H8A...O12 <sup>i</sup>        | 0.86   | 1.80     | 2.654 (9)  | 174.9                |
| N10—H10A...O2 <sup>ii</sup>      | 0.86   | 1.85     | 2.688 (14) | 163.9                |
| N11—H11B...O7 <sup>iii</sup>     | 0.86   | 1.71     | 2.562 (9)  | 172.6                |
| N15—H15B...O15 <sup>iv</sup>     | 0.86   | 1.79     | 2.646 (11) | 174.4                |
| N9—H9B...O23                     | 0.86   | 1.75     | 2.610 (8)  | 175.6                |
| N12—H12A...O22                   | 0.86   | 1.74     | 2.601 (7)  | 174.8                |
| N14—H14A...O20                   | 0.86   | 1.76     | 2.601 (9)  | 165.5                |
| <b>3</b>                         |        |          |            |                      |
| N10—H10...O1 <sup>i</sup>        | 0.86   | 2.02     | 2.819 (9)  | 154.6                |
| N7—H7...O13 <sup>ii</sup>        | 0.86   | 2.07     | 2.844 (9)  | 149.0                |
| N8—H8...O15 <sup>iii</sup>       | 0.86   | 1.75     | 2.598 (7)  | 169.3                |
| N9—H9...O3 <sup>iv</sup>         | 0.86   | 1.74     | 2.593 (9)  | 168.8                |
| N12—H12...O23 <sup>iv</sup>      | 0.86   | 1.81     | 2.670 (11) | 173.4                |
| N11—H11...O12 <sup>v</sup>       | 0.86   | 1.74     | 2.603 (8)  | 178.3                |
| <b>4</b>                         |        |          |            |                      |
| O7—H7B...O4 <sup>i</sup>         | 0.88   | 2.02     | 2.844 (3)  | 156.7                |
| O7—H7A...Cl1 <sup>ii</sup>       | 0.91   | 2.32     | 3.216 (2)  | 167.0                |
| O6—H6B...O7 <sup>iii</sup>       | 0.87   | 1.77     | 2.634 (3)  | 174.7                |
| O6—H6A...O2 <sup>iv</sup>        | 0.87   | 1.76     | 2.626 (3)  | 169.2                |

Symmetry Codes: for 1, (i): x,y,z; (ii): x+1,y-1,z+1; (iii): -x+1,y+1/2,-z+1/2, (iv):

x,-y+5/2,z-1/2; (v): x,-y+3/2,z-1/2, for 2, (i) x, y, 1+z; (ii) -1+x, y, z; (iii) x, 1+y, z; (iv) 1+x,  
 1+y, z, for 3, (i): x, y, z; (ii): 1-x, 1-y, 1-z; (iii): 2-x, 2-y, 1-z; (iv): -1+x, -1+y, z; (v): 1-x, 1-y,  
 -z, for 4, (i): -1+x, 1/2-y, -1/2+z; (ii): 1-x, 1/2+y, 1/2-z; (iii): 1+x, y, z; (iv) 2-x, -1/2+y, 1/2-z.
